# Supplementary material for: Factors Associated with Dental Service Use Based on the Andersen Model: A Systematic Review
Source: PubMed Central journal article supplement (PMC7967618; doi:10.3390/ijerph18052491), 2021-03-03
Supplement: ijerph-18-02491-s001.pdf [file ijerph-18-02491-s001.pdf]

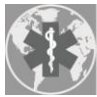

**Table S1.** Key findings (children/adolescents) - extended

|                                                                 | Number of studies | Positive relationship | Negative relationship | No relationship |
|-----------------------------------------------------------------|-------------------|-----------------------|-----------------------|-----------------|
| <b>Predisposing characteristics</b>                             | 10                |                       |                       |                 |
| Age                                                             | 6                 | 4                     | 0                     | 2               |
| Parent's education                                              | 3                 | 3                     | 0                     | 0               |
| Sex (female, ref.: male)                                        | 7                 | 2                     | 0                     | 5               |
| Nationality or place of birth (ref.: foreign)                   | 2                 | 0                     | 0                     | 2               |
| Family income or wealth                                         | 2                 | 0                     | 0                     | 2               |
| High oral health attitude                                       | 3                 | 2                     | 0                     | 1               |
| Household overcrowding                                          | 1                 | 0                     | 0                     | 1               |
| Ethnicity (white, ref.: non-white)                              | 2                 | 0                     | 1                     | 1               |
| Tobacco use†                                                    | 1                 | 0                     | 1                     | 0               |
| Substance abuse                                                 | 1                 | 0                     | 1                     | 0               |
| Drinking soda                                                   | 1                 | 0                     | 1                     | 0               |
| Never or rarely wearing a seatbelt                              | 1                 | 0                     | 1                     | 0               |
| High oral health knowledge                                      | 2                 | 1                     | 0                     | 1               |
| Parent's sense of coherence                                     | 1                 | 0                     | 1                     | 0               |
| Residence (natural or rural, ref.: urban)                       | 1                 | 0                     | 1                     | 0               |
| Family structure (ref.: living with two parents in a household) | 1                 | 0                     | 0                     | 1               |
| School setting (ref.: public)                                   | 1                 | 0                     | 0                     | 1               |
| Work setting (ref.: not working)                                | 2                 | 0                     | 0                     | 2               |
| Regular source of oral health                                   | 1                 | 1                     | 0                     | 0               |
| <b>Enabling resources</b>                                       | 9                 |                       |                       |                 |
| Family income                                                   | 5                 | 4                     | 0                     | 1               |
| School type (ref.: public)                                      | 1                 | 0                     | 0                     | 1               |
| Government financial support or family help program             | 2                 | 1                     | 0                     | 1               |
| Medical insurance                                               | 2                 | 1                     | 0                     | 1               |

|                                           |   |   |   |   |
|-------------------------------------------|---|---|---|---|
| Residence (natural or rural, ref.: urban) | 3 | 0 | 2 | 1 |
| Caregiver's education                     | 2 | 2 | 0 | 0 |
| Caregiver speaking local language well    | 2 | 1 | 0 | 1 |
| Going to kindergarten or school           | 1 | 1 | 0 | 0 |
| Living with both parents                  | 1 | 1 | 0 | 0 |
| Socioeconomic status                      | 1 | 1 | 0 | 0 |
| Social involvement                        | 1 | 1 | 0 | 0 |
| <b>Need factors</b>                       | 8 |   |   |   |
| Carrying experience                       | 1 | 1 | 0 | 0 |
| Oral health                               | 1 | 1 | 0 | 0 |
| Oral health problem                       | 4 | 4 | 0 | 0 |
| Overweight                                | 1 | 0 | 1 | 0 |
| Disability                                | 1 | 0 | 1 | 0 |
| Overall health                            | 1 | 0 | 0 | 1 |
| Overall health problem                    | 1 | 0 | 1 | 0 |
| Self-rated health                         | 1 | 0 | 1 | 0 |
| Decayed or missing teeth                  | 1 | 1 | 0 | 0 |
| Dental pain                               | 1 | 1 | 0 | 0 |
| <b>Psychosocial factors</b>               | 1 |   |   |   |
| Psychological distress                    | 1 | 0 | 0 | 1 |

Table S2. Key findings (adults) - extended

|                                                        | Number of studies | Positive relationship | Negative relationship | No relationship |
|--------------------------------------------------------|-------------------|-----------------------|-----------------------|-----------------|
| <b>Predisposing characteristics</b>                    | 31                |                       |                       |                 |
| Age                                                    | 21                | 5                     | 2                     | 14              |
| Sex (female, ref.: male)                               | 24                | 11                    | 4                     | 7               |
| Marital status (living in a partnership, ref.: single) | 12                | 3                     | 0                     | 8               |
| Ethnicity (white, ref.: non-white)                     | 11                | 3                     | 4                     | 4               |
| Education                                              | 16                | 8                     | 4                     | 3               |
| Household size                                         | 3                 | 1                     | 0                     | 2               |
| Wearing dentures                                       | 1                 | 0                     | 1                     | 2               |
| Being edentulous                                       | 3                 | 0                     | 3                     | 0               |
| Not being afraid of the visit                          | 2                 | 2                     | 0                     | 0               |

2

3

|                                                                 |    |   |   |   |
|-----------------------------------------------------------------|----|---|---|---|
| Motivation to visit                                             | 4  | 4 | 0 | 0 |
| Oral health beliefs                                             | 3  | 0 | 0 | 3 |
| General health                                                  | 4  | 0 | 1 | 3 |
| Having a dentist available                                      | 1  | 0 | 0 | 1 |
| Asking for the dentist's advice                                 | 1  | 1 | 0 | 0 |
| Days worked farming                                             | 1  | 0 | 0 | 1 |
| Toothache                                                       | 1  | 1 | 0 | 0 |
| Social network                                                  | 1  | 0 | 1 | 0 |
| Being religious                                                 | 2  | 1 | 0 | 1 |
| Importance                                                      | 1  | 0 | 1 | 0 |
| Drinking                                                        | 1  | 0 | 1 | 0 |
| Smoking                                                         | 1  | 0 | 0 | 1 |
| Income or wealth                                                | 2  | 2 | 0 | 0 |
| Dependency                                                      | 1  | 0 | 1 | 0 |
| Travelling                                                      | 1  | 0 | 0 | 1 |
| Toothbrushing                                                   | 2  | 1 | 0 | 1 |
| Number of children                                              | 1  | 0 | 0 | 1 |
| Former drinking                                                 | 1  | 1 | 0 | 0 |
| Use of dental floss                                             | 1  | 0 | 0 | 1 |
| Religious beliefs (ref.: no)                                    | 1  | 0 | 0 | 1 |
| Thinking that going to the dentist is synonymous with pain      | 1  | 0 | 1 | 0 |
| <b>Enabling resources</b>                                       | 30 |   |   |   |
| Income or wealth                                                | 17 | 8 | 3 | 6 |
| Good quality of dental care                                     | 1  | 1 | 0 | 0 |
| Dental care as a child                                          | 1  | 0 | 1 | 0 |
| Public care                                                     | 7  | 4 | 1 | 2 |
| Health or health care knowledge                                 | 3  | 0 | 2 | 1 |
| Health or dental insurance                                      | 8  | 3 | 2 | 3 |
| Dental benefits                                                 | 3  | 1 | 0 | 2 |
| Occupation (white collar, ref.: blue collar)                    | 3  | 3 | 0 | 0 |
| Transportation problems                                         | 4  | 0 | 1 | 3 |
| Regular medical visits                                          | 3  | 1 | 0 | 2 |
| Socioeconomic status                                            | 1  | 1 | 0 | 0 |
| Living place (former socialist regime, ref.: capitalist regime) | 1  | 1 | 0 | 0 |

|                                                                    |           |   |   |   |
|--------------------------------------------------------------------|-----------|---|---|---|
| Living place (rural, ref.: urban)                                  | 6         | 2 | 1 | 3 |
| Social support                                                     | 5         | 4 | 0 | 1 |
| Usual source of care                                               | 6         | 5 | 0 | 1 |
| Dental visits                                                      | 1         | 0 | 0 | 1 |
| Acculturation                                                      | 3         | 0 | 0 | 3 |
| Education                                                          | 4         | 3 | 0 | 1 |
| Household size                                                     | 1         | 0 | 0 | 1 |
| Length of stay in one's country                                    | 1         | 0 | 0 | 1 |
| Health beliefs (ref.: not motivated to or afraid of visit)         | 2         | 1 | 1 | 0 |
| Unemployment                                                       | 4         | 2 | 1 | 1 |
| Alcohol drinking or smoking                                        | 1         | 0 | 1 | 0 |
| Recent illness                                                     | 1         | 1 | 0 | 0 |
| Having a caregiver due to a falling accident                       | 1         | 0 | 1 | 0 |
| Being a village health volunteer                                   | 1         | 0 | 1 | 0 |
| Participation in a club for the elderly                            | 1         | 0 | 1 | 0 |
| Dental hygiene practice                                            | 2         | 1 | 0 | 1 |
| Use of public transport systems or walking (vs. motorized vehicle) | 2         | 0 | 2 | 0 |
| Poor connection or long distance to a dentist                      | 2         | 0 | 0 | 2 |
| Out-of-pocket dental payment                                       | 1         | 1 | 0 | 0 |
| Competing needs                                                    | 1         | 0 | 1 | 0 |
| HIV knowledge                                                      | 1         | 0 | 1 | 0 |
| Perceived personal risk of HIV                                     | 1         | 0 | 0 | 1 |
| Attitude towards people with HIV                                   | 1         | 0 | 0 | 1 |
| Waiting lists as a barrier to care                                 | 1         | 1 | 0 | 0 |
| High costs as a barrier to care                                    | 1         | 0 | 1 | 0 |
| Dental fear                                                        | 1         | 1 | 0 | 0 |
| Being recalled                                                     | 1         | 1 | 0 | 0 |
| Use of dental floss                                                | 1         | 1 | 0 | 0 |
| <b>Need factors</b>                                                | <b>29</b> |   |   |   |
| Oral health                                                        | 6         | 1 | 3 | 2 |

|                                                     |     |     |     |     |
|-----------------------------------------------------|-----|-----|-----|-----|
| Missing no or not many teeth                        | 6   | 2   | 4   | 0   |
| Perceived oral health problems                      | 2   | 1   | 1   | 0   |
| Not holding regular dental attendance for important | 0   | 0   | 1   | 0   |
| Being satisfied with one's teeth appearance         | 1   | 1   | 0   | 0   |
| Oral health problems                                | 10  | 6   | 0   | 4   |
| Dental attendance due to preventive reasons         | 2   | 1   | 0   | 1   |
| General health status                               | 5   | 1   | 1   | 3   |
| Activities of daily living (ref.: no problems)      | 2   | 0   | 0   | 2   |
| Problems with physical activities                   | 2   | 0   | 0   | 2   |
| Health problems                                     | 4   | 0   | 1   | 3   |
| Oral pain                                           | 3   | 2   | 1   | 0   |
| Decayed teeth                                       | 4   | 1   | 1   | 2   |
| Need of treatment                                   | 8   | 2   | 3   | 3   |
| General problems due to an oral problem             | 4   | 1   | 1   | 2   |
| Missing all teeth                                   | 1   | 1   | 0   | 0   |
| Wearing a denture                                   | 2   | 1   | 0   | 1   |
| Filled teeth                                        | 3   | 3   | 0   | 0   |
| Fluoride                                            | 1   | 0   | 0   | 1   |
| Periodontal pocket measures                         | 1   | 0   | 0   | 1   |
| Eating fruit                                        | 1   | 1   | 0   | 0   |
| Mental health (ref.: good)                          | 1   | 0   | 0   | 1   |
| Eating vegetables                                   | 1   | 0   | 0   | 1   |
| Smoking                                             | 2   | 0   | 1   | 1   |
| Place of sick care                                  | 1   | 0   | 0   | 1   |
| Normal BMI                                          | 1   | 1   | 0   | 0   |
| <b>Psychosocial factors</b>                         |     |     |     |     |
| ---                                                 | --- | --- | --- | --- |
